# Supplementary material for: Reciprocal impacts of telomerase activity and ADRN/MES differentiation state in neuroblastoma tumor biology
Source: PubMed Central journal article supplement (PMC8604896; doi:10.1038/s42003-021-02821-8), 2021-11-19
Supplement: 42003_2021_2821_MOESM3_ESM.pdf [file 42003_2021_2821_MOESM3_ESM.pdf]

## Description of Additional Supplementary Files

**File name:** Supplementary Data 1

**Description:** Source data for all graphs and charts.
